# Supplementary material for: Identification of plasma modes in Galactic turbulence with synchrotron polarization
Source: Springer Nature journal article supplement (doi:10.1038/s41550-020-1093-4), 2020-05-25
Supplement: 41550_2020_1093_MOESM1_ESM.pdf [file 41550_2020_1093_MOESM1_ESM.pdf]

In the format provided by the authors and unedited.

# Identification of plasma modes in Galactic turbulence with synchrotron polarization

Heshou Zhang <sup>1,2</sup>, Alexey Chepurnov<sup>1</sup>, Huirong Yan <sup>1,2</sup> , Kirit Makwana<sup>1</sup>, Reinaldo Santos-Lima<sup>1,2</sup> and Sarah Appleby<sup>3</sup>

---

<sup>1</sup>Deutsches Elektronen-Synchrotron DESY, Zeuthen, Germany. <sup>2</sup>Institut für Physik und Astronomie, Universität Potsdam, Potsdam, Germany. <sup>3</sup>Institute for Astronomy, University of Edinburgh, Royal Observatory, Edinburgh, UK. ✉e-mail: [huirong.yan@desy.de](mailto:huirong.yan@desy.de)

# Identification of plasma modes in Galactic turbulence with synchrotron polarization

Heshou Zhang<sup>1,2</sup>, Alexey Chepurnov<sup>1</sup>, Huirong Yan<sup>1,2\*</sup>, Kirit Makwana<sup>1</sup>,  
Reinaldo Santos-Lima<sup>1,2</sup> and Sarah Appleby<sup>3</sup>

March 25, 2020

## This PDF file includes

Supplementary Text

Supplementary References

\*Email: huirong.yan@desy.de.

## Simulation on decomposed MHD modes

In order to establish the classification recipe, we perform MHD simulations to generate datacubes of sub- and trans-Alfvénic turbulence with low- and high- plasma beta and decompose these MHD turbulence into three linear modes (Alfvén, fast and slow,<sup>33</sup>). We use probability distribution analysis to study the signatures produced from these decomposed MHD data cubes. The “MS” signature stands out only in low- $\beta$  fast modes and the dominance of “Alfvénic” signature only appears in Alfvénic turbulence (see Extended Data Fig. 1). This analysis indicates that, in the total datacubes, “MS” signature will be the revealing signature for the dominance of MS modes since the quantities  $s_{xx}$  are additive. We note that, current classification recipe identifies plasma modes in trans-Alfvénic turbulence, whereas in all our tests for sub-Alfvénic turbulence, there is no violation to the current classification recipe.

## References

<sup>1</sup> Cho, J. & Lazarian, A. Compressible magnetohydrodynamic turbulence: mode coupling, scaling relations, anisotropy, viscosity-damped regime and astrophysical implications. *Mon. Not. R. Astron. Soc.* **345**, 325–339 (2003).
